# Supplementary material for: Health Insurance Coverage Disruptions and Access to Care and Affordability among Cancer Survivors in the United States
Source: Oxford University Press journal article supplement (doi:10.1158/1055-9965.epi-20-0518), 2020-08-31
Supplement: 10559965epi200518-sup-240738_2_supp_6480879_qlnkzz.docx [file 10559965epi200518-sup-240738_2_supp_6480879_qlnkzz.docx]

**Supplementary Table S4**. Associations of Health Insurance Coverage Disruptions and Access to Healthcare and Care Affordability among Cancer Survivors Currently with Any Private Coverage, 18-64 Years, National Health Interview Survey, 2011-2018 (N=4,978)

|  | Continuously insured (ref) | With disruptions |
| --- | --- | --- |
|  | Adjusted OR | Adjusted OR (95% CI) |
| Preventive service use |  |  |
| Blood pressure check | 1.00 | **0.31 (0.16 - 0.61)** |
| Blood cholesterol check | 1.00 | **0.34 (0.22 - 0.53)** |
| Flu shot | 1.00 | **0.39 (0.26 - 0.59)** |
| Dentist visit | 1.00 | **0.40 (0.26 - 0.62)** |
| All preventive service use | 1.00 | **0.38 (0.23 - 0.63)** |
| Problems with care affordability | 1.00 |  |
| Medical care | 1.00 | **6.41 (3.97 - 10.34)** |
| Prescription medicine | 1.00 | **5.58 (3.62 - 8.61)** |
| Mental care | 1.00 | **2.42 (1.19 - 4.92)** |
| Dental care | 1.00 | **3.90 (2.55 - 5.97)** |
| Eyeglasses | 1.00 | **3.10 (1.93 - 5.00)** |
| See a specialist | 1.00 | **4.96 (2.94 - 8.38)** |
| Follow-up care | 1.00 | **4.43 (2.44 - 8.06)** |
| Any forgo care because of cost | 1.00 | **4.73 (3.15 - 7.11)** |
| Cost-related medication nonadherence | 1.00 |  |
| Skipping medication | 1.00 | **4.06 (2.27 - 7.28)** |
| Taking less medication | 1.00 | **3.10 (1.72 - 5.60)** |
| Delaying filling a prescription | 1.00 | **6.00 (3.56 - 10.12)** |
| Any medication nonadherence | 1.00 | **5.26 (3.17 - 8.73)** |

Note: Data from 2011-2018 National Health Interview Survey. All models adjusted for survey year, age, sex, race/ethnicity, marital status, educational attainment, family income as a percentage of federal poverty level (FPL) (<100% FPL, 100-399% FPL, >=400 FPL%), and region. OR, odds ratio; CI, confidence interval. Boldface type indicates statistical significance (p<0.05).
