# Supplementary material for: Health Insurance Coverage Disruptions and Access to Care and Affordability among Cancer Survivors in the United States
Source: Oxford University Press journal article supplement (doi:10.1158/1055-9965.epi-20-0518), 2020-08-31
Supplement: 10559965epi200518-sup-240738_2_supp_6480880_q6nkzz.docx [file 10559965epi200518-sup-240738_2_supp_6480880_q6nkzz.docx]

**Supplementary Table S5**. Associations of Health Insurance Coverage Disruptions and Access to Healthcare and Care Affordability among Cancer Survivors, by Cancer Site, 18-64 Years, National Health Interview Survey, 2011-2018 (N=7,186)

|  | Cancer site | | | |
| --- | --- | --- | --- | --- |
| Female breast (n=1370) | Colorectal (n=463) | Prostate (n=442) | Others (n=4911) |
| Adjusted OR (95% CI) | Adjusted OR (95% CI) | Adjusted OR (95% CI) | Adjusted OR (95% CI) |
| Any private |  |  |  |  |
| Preventive service use | |  |  |  |
| Blood pressure check | 0.36 (0.08 - 1.71) | 0.72 (0.12 - 4.37) | -- | **0.33 (0.15 - 0.72)** |
| Blood cholesterol check | 0.41 (0.16 - 1.05) | 0.65 (0.18 - 2.29) | 0.14 (0.02 - 1.11) | **0.27 (0.16 - 0.46)** |
| Flu shot | 0.58 (0.22 - 1.53) | 0.25 (0.04 - 1.50) | 0.22 (0.03 - 1.57) | **0.34 (0.20 - 0.60)** |
| Dentist visit | **0.32 (0.11 - 0.92)** | 1.77 (0.34 - 9.13) | 0.59 (0.09 - 3.86) | **0.42 (0.24 - 0.73)** |
| All preventive service use | 0.61 (0.21 - 1.73) | 0.60 (0.09 - 4.00) | **0.1 (0.01 - 0.83)** | **0.30 (0.14 - 0.63)** |
| Problems with care affordability | |  |  |  |
| Medical care | **3.22 (1.14 - 9.16)** | 2.16 (0.29 - 16.31) | **45.5 (8.6 - 240.73)** | **13.48 (7.54 - 24.09)** |
| Prescription medicine | **3.15 (1.22 - 8.12)** | 0.27 (0.03 - 2.48) | 5.94 (0.69 - 51.13) | **9.41 (5.29 - 16.74)** |
| Mental care | 5.18 (0.94 - 28.38) | -- | -- | **4.08 (1.62 - 10.28)** |
| Dental care | 2.63 (0.99 - 7.01) | 4.05 (0.65 - 25.29) | 6.97 (0.79 - 61.2) | **5.73 (3.21 - 10.23)** |
| Eyeglasses | 2.13 (0.73 - 6.22) | 1.11 (0.19 - 6.49) | -- | **4.91 (2.63 - 9.15)** |
| See a specialist | **4.54 (1.37 - 15.02)** | 1.85 (0.18 - 19.14) | -- | **7.85 (3.91 - 15.76)** |
| Follow-up care | 2.54 (0.83 - 7.79) | 1.91 (0.19 - 18.78) | -- | **8.36 (3.87 - 18.07)** |
| Any forgo care because of cost | **3.22 (1.24 - 8.35)** | 2.31 (0.51 - 10.4) | **9.77 (1.88 - 50.62)** | **8.12 (4.69 - 14.04)** |
| Cost-related medication nonadherence | |  |  |  |
| Skipping medication | **6 (1.66 - 21.73)** | 2.57 (0.29 - 22.53) | **22.56 (2.4 - 212.19)** | **4.70 (2.06 - 10.73)** |
| Taking less medication | **4.64 (1.3 - 16.6)** | 1.86 (0.21 - 16.25) | **37.07 (3.35 - 410.41)** | **4.98 (2.15 - 11.52)** |
| Delaying filling a prescription | 2.94 (0.97 - 8.88) | 1.02 (0.18 - 5.95) | **37.09 (2.99 - 459.47)** | **11.87 (5.65 - 24.95)** |
| Any medication nonadherence | 2.88 (0.93 - 8.93) | 2.15 (0.34 - 13.73) | **21.13 (2.11 - 211.49)** | **9.21 (4.53 - 18.74)** |
| Public only |  |  |  |  |
| Preventive service use | |  |  |  |
| Blood pressure check | 0.35 (0.09 - 1.39) | 0.79 (0.06 - 10.21) | -- | 0.77 (0.25 - 2.32) |
| Blood cholesterol check | 1.20 (0.40 - 3.61) | 0.55 (0.07 - 4.60) | -- | 0.84 (0.45 - 1.58) |
| Flu shot | 1.67 (0.62 - 4.48) | 2.87 (0.46 - 17.96) | 0.55 (0.11 - 2.79) | **0.35 (0.18 - 0.68)** |
| Dentist visit | 0.55 (0.22 - 1.40) | 0.22 (0.04 - 1.35) | 0.98 (0.16 - 5.86) | **0.52 (0.28 - 0.97)** |
| All preventive service use | 1.04 (0.42 - 2.58) | 0.63 (0.09 - 4.53) | 1.29 (0.23 - 7.37) | **0.29 (0.12 - 0.66)** |
| Problems with care affordability | |  |  |  |
| Medical care | **6.34 (2.38 - 16.89)** | **24.96 (4.66 - 133.82)** | **7.64 (1.09 - 53.49)** | **5.24 (2.81 - 9.77)** |
| Prescription medicine | **6.74 (2.39 - 19.05)** | 2.96 (0.79 - 11.05) | 6.95 (0.97 - 49.74) | **3.97 (2.19 - 7.19)** |
| Mental care | 0.24 (0.03 - 2.04) | 0.24 (0.02 - 2.41) | 1.59 (0.09 - 29.20) | 2.06 (0.83 - 5.08) |
| Dental care | **4.40 (1.73 - 11.16)** | 2.46 (0.76 - 7.93) | 1.89 (0.34 - 10.46) | **3.20 (1.74 - 5.91)** |
| Eyeglasses | 2.49 (0.96 - 6.43) | 0.88 (0.21 - 3.70) | **22.37 (3.69 - 135.73)** | **2.45 (1.37 - 4.38)** |
| See a specialist | 2.79 (0.92 - 8.49) | **11.12 (1.58 - 78.42)** | 7.81 (0.99 - 61.93) | **3.62 (1.92 - 6.80)** |
| Follow-up care | **4.23 (1.18 - 15.23)** | **15.57 (1.75 - 138.74)** | **26.02 (2.65 - 255.99)** | **5.11 (2.46 - 10.62)** |
| Any forgo care because of cost | **9.97 (3.09 - 32.12)** | 7.86 (0.89 - 69.26) | -- | **3.42 (1.69 - 6.92)** |
| Cost-related medication nonadherence | |  |  |  |
| Skipping medication | 3.07 (0.72 - 13.10) | 0.88 (0.17 - 4.68) | 6.96 (0.43 - 113.29) | **4.45 (2.06 - 9.64)** |
| Taking less medication | **4.58 (1.20 - 17.42)** | 1.16 (0.25 - 5.42) | 2.83 (0.26 - 30.68) | **3.55 (1.57 - 8.01)** |
| Delaying filling a prescription | 3.19 (0.79 - 12.87) | 1.62 (0.37 - 7.16) | 3.79 (0.43 - 33.56) | **3.15 (1.40 - 7.07)** |
| Any medication nonadherence | 2.71 (0.73 - 10.14) | 1.14 (0.28 - 4.68) | 3.27 (0.38 - 28.00) | **3.33 (1.52 - 7.28)** |

Note: Data from 2011-2018 National Health Interview Survey. All models adjusted for survey year, age, sex, race/ethnicity, marital status, educational attainment, and region. OR, odds ratio; CI, confidence interval. The Odds ratios compare the odds of reporting study outcomes among those with coverage disruptions to continuously insured. Boldface type indicates statistical significance (p<0.05).
