# Supplementary material for: Health Insurance Coverage Disruptions and Access to Care and Affordability among Cancer Survivors in the United States
Source: Oxford University Press journal article supplement (doi:10.1158/1055-9965.epi-20-0518), 2020-08-31
Supplement: 10559965epi200518-sup-240738_2_supp_6480882_q8nkzz.docx [file 10559965epi200518-sup-240738_2_supp_6480882_q8nkzz.docx]

**Supplementary Table S1. National Health Interview questions on access to healthcare and affordability**

| **Measures** | **National Health Interview Survey questions** | **Time Frame** |
| --- | --- | --- |
| Access to care | During the past 12 months, have you had your blood pressure checked by a doctor, nurse, or other health professional? | 2011-2018 |
| During the past 12 months, have you had your blood cholesterol checked by a doctor, nurse, or other health professional? | 2011-2018 |
| During the past 12 months, have you had a flu shot? A flu shot is usually given in the fall and protects against influenza for the flu season. | 2011-2018 |
| About how long has it been since you last saw a dentist? Include all types of dentists, such as orthodontists, oral surgeons, and all other dental specialists, as well as dental hygienists. | 2011-2018 |
| Healthcare affordability | During the past 12 months, was there any time when you needed any of the following, but did not get it because you couldn't afford it |  |
| −      Couldn't afford medical care | 2011-2018 |
| −      Couldn't afford prescription medicine, past 12 months | 2011-2018 |
| −      Couldn't afford mental health care/counseling | 2011-2018 |
| −      Couldn't afford dental care | 2011-2018 |
| −      Couldn't afford eyeglasses | 2011-2018 |
| −      Couldn't afford to see a specialist | 2011-2017 |
| −     Couldn't afford follow-up care | 2011-2017 |
| During the past 12 months, were any of the following true for you? |  |
| −      You skipped medication doses to save money | 2013-2018 |
| −      You took less medicine to save money | 2013-2018 |
| −      You delayed filling a prescription to save money | 2013-2018 |
